# Supplementary figures and images for: A novel luminescent 3D polymer containing silver chains formed by ligand unsupported Ag–Ag interactions and organic spacers
Source: Royal Society of Chemistry journal article supplement (doi:10.1039/b110436e), 2002-01-01

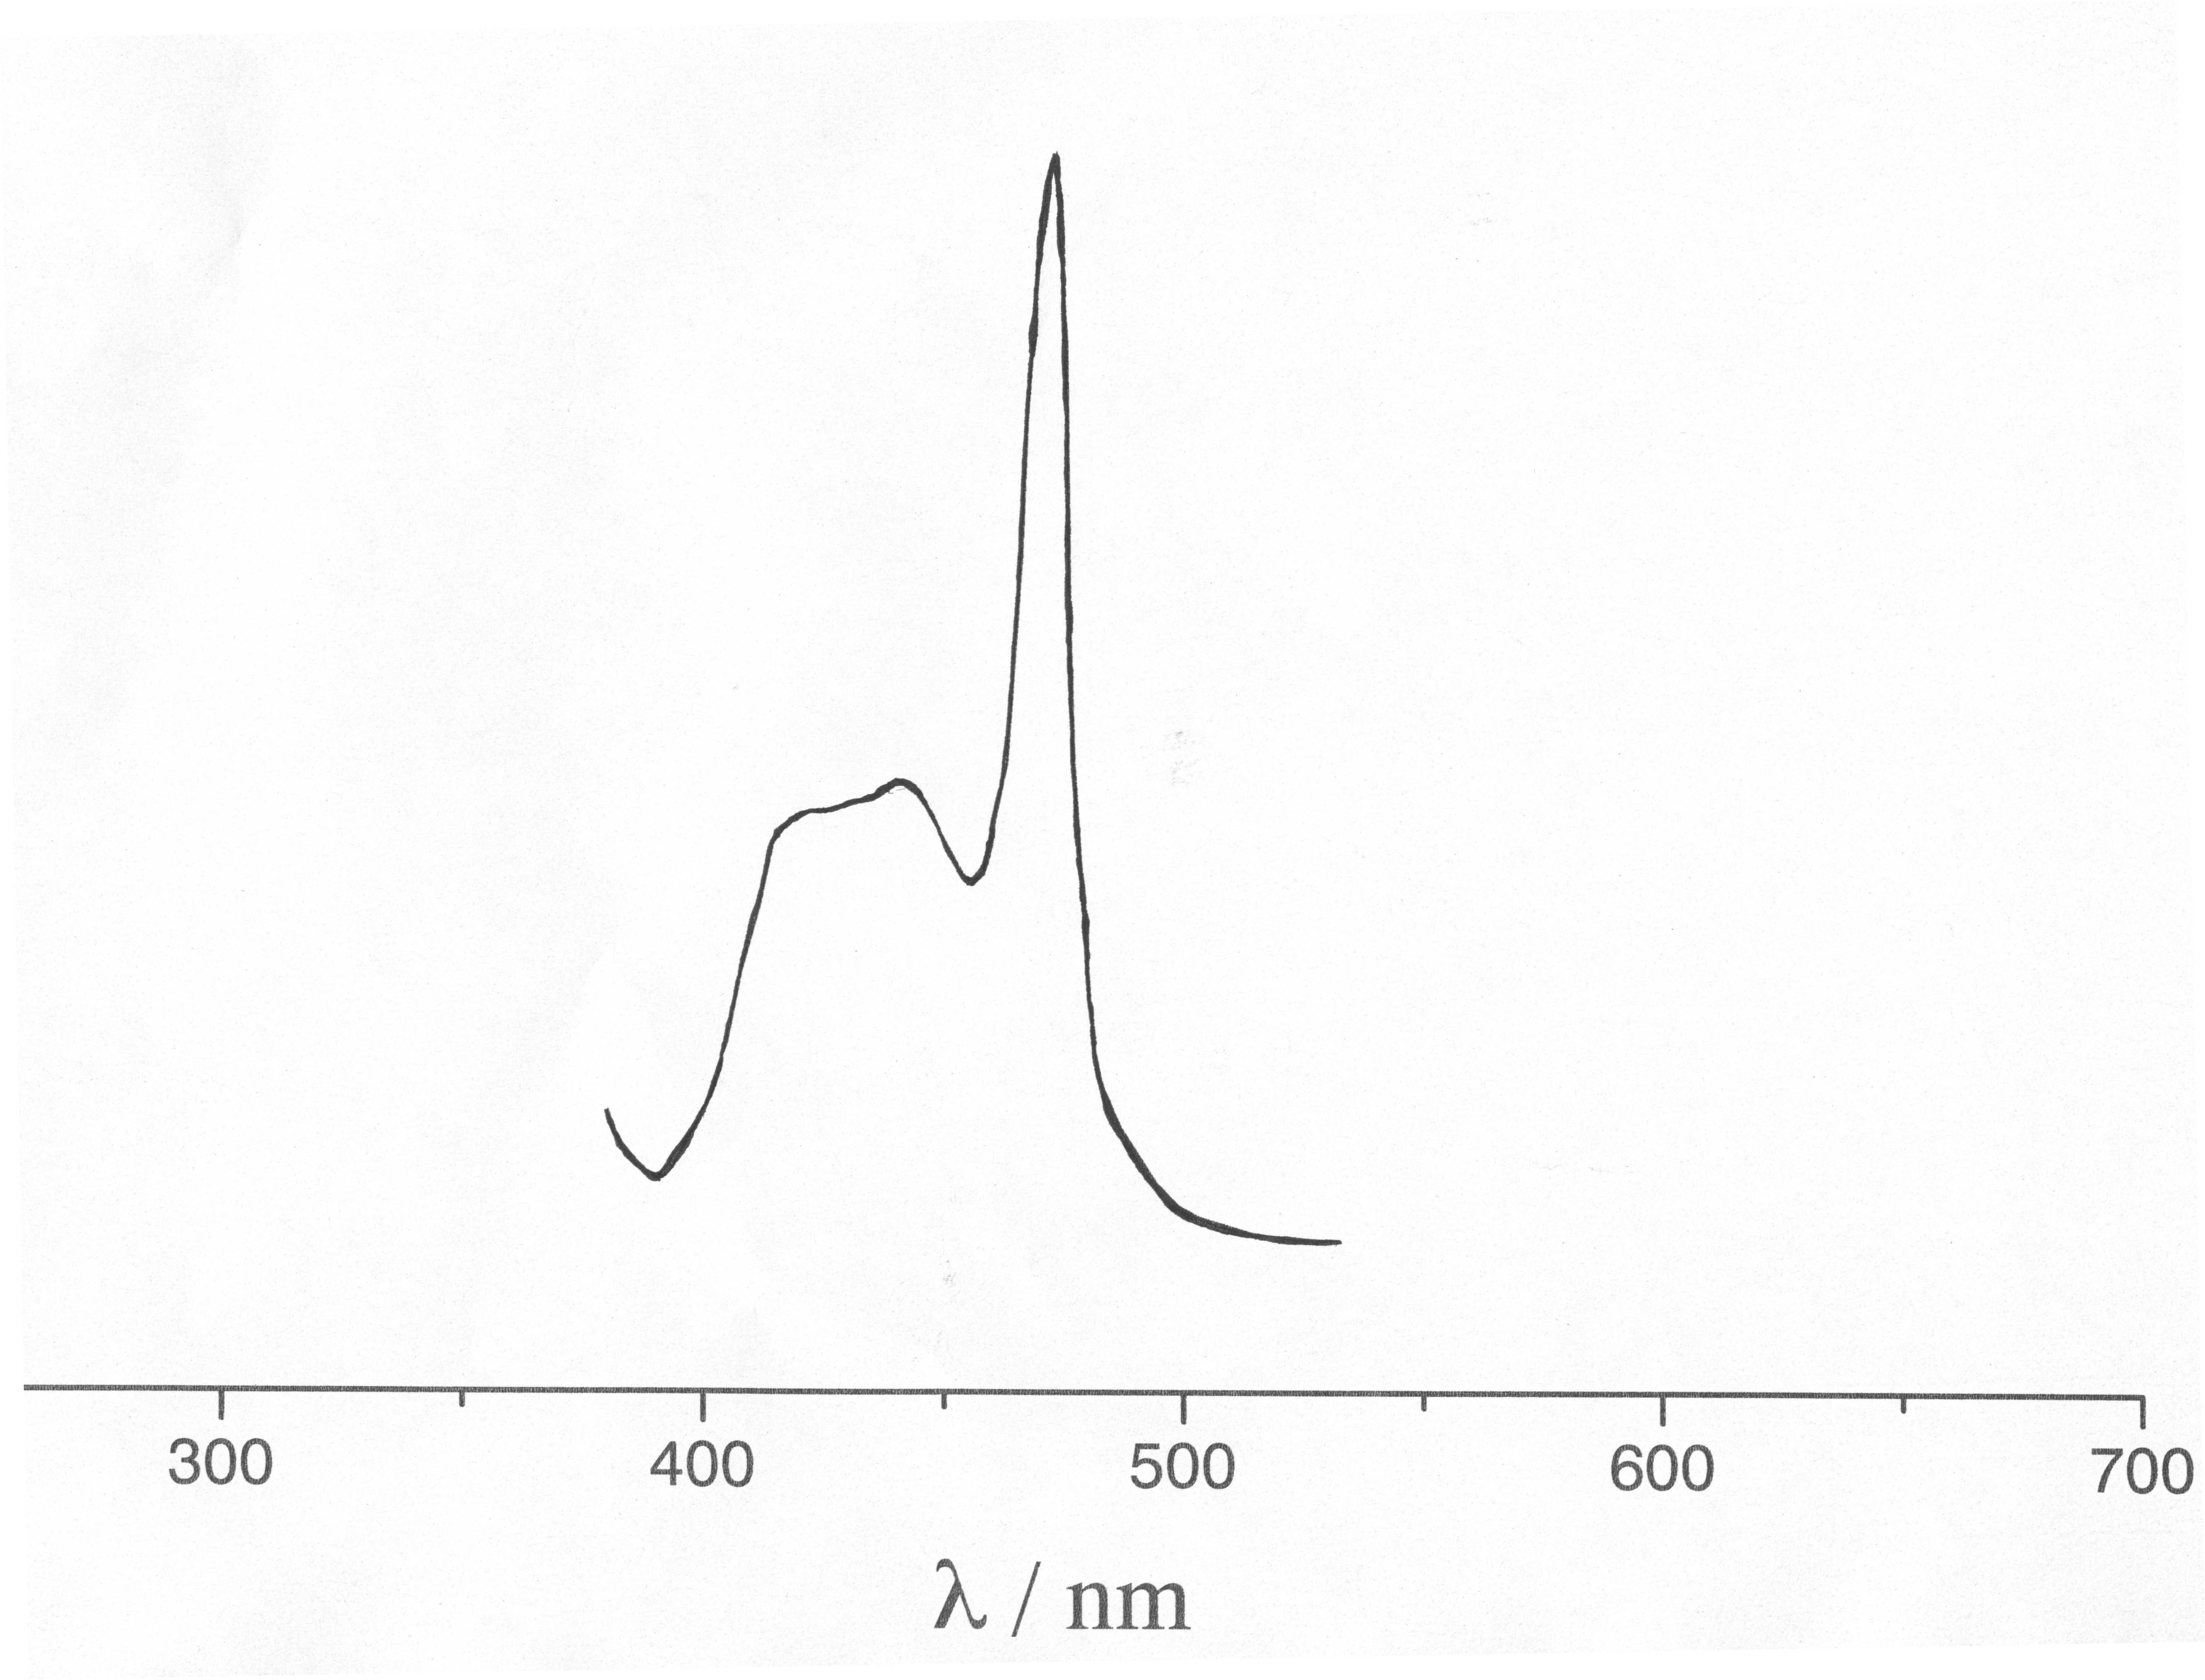


Photoluminescence emission spectrum of **1** with a 360 nm excitation source.

Supplement: b110436e.doc [file b110436e.doc]
